# Supplementary material
Source: publisher figshare collection journal article supplement (https://acs.figshare.com/ndownloader/files/5785719)
Supplement: Supplementary file 1 [file 5785719]

### Supplementary Information

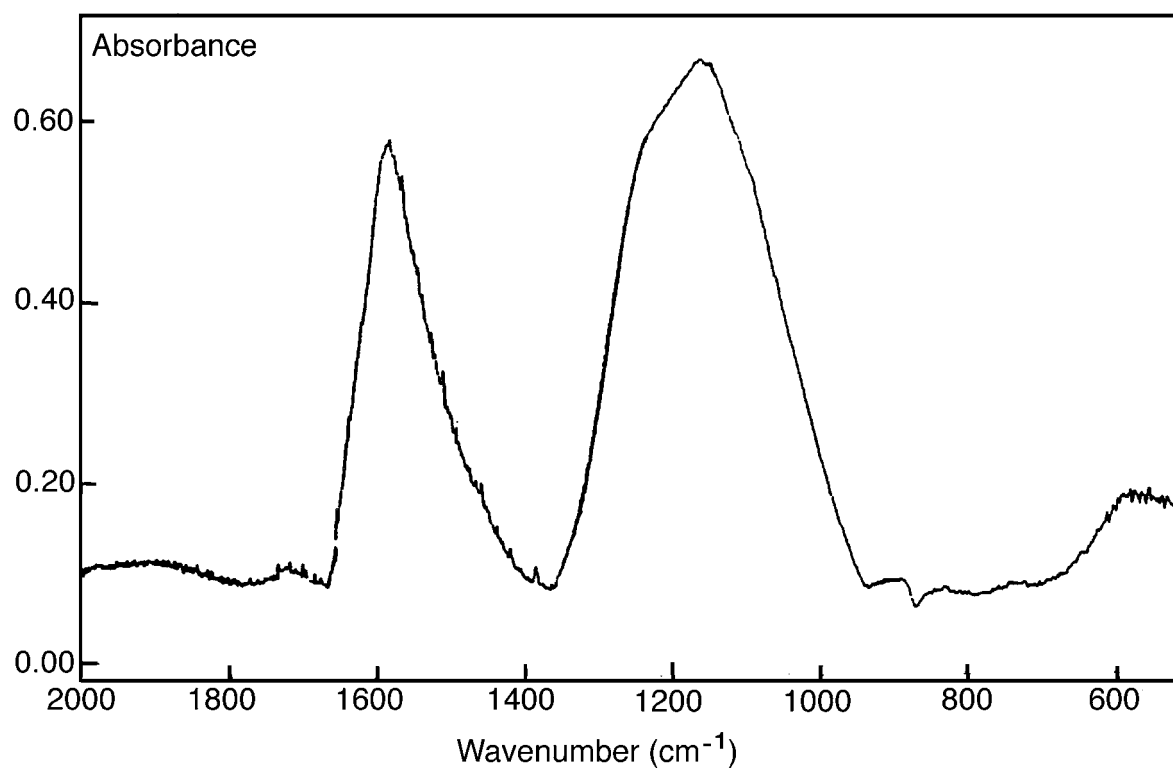

**Figure S1.** FTIR spectrum of the carbon felt Actitex 1501.

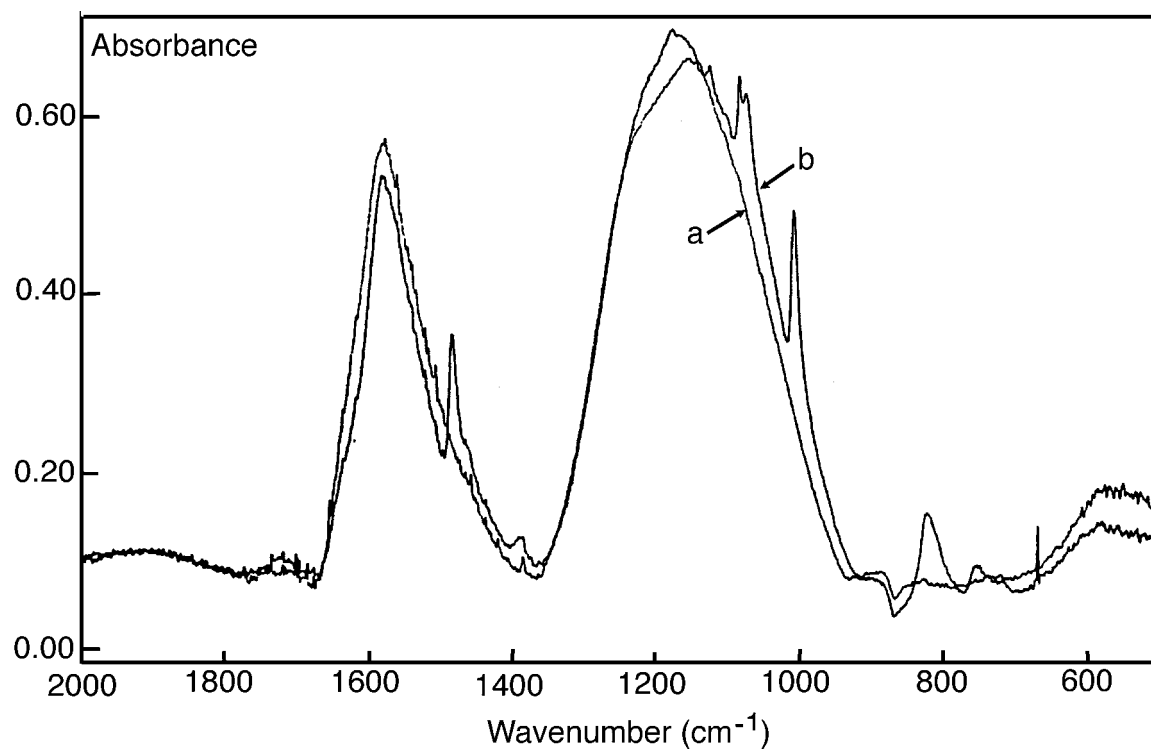

**Figure S2.** FTIR spectrum of C2.

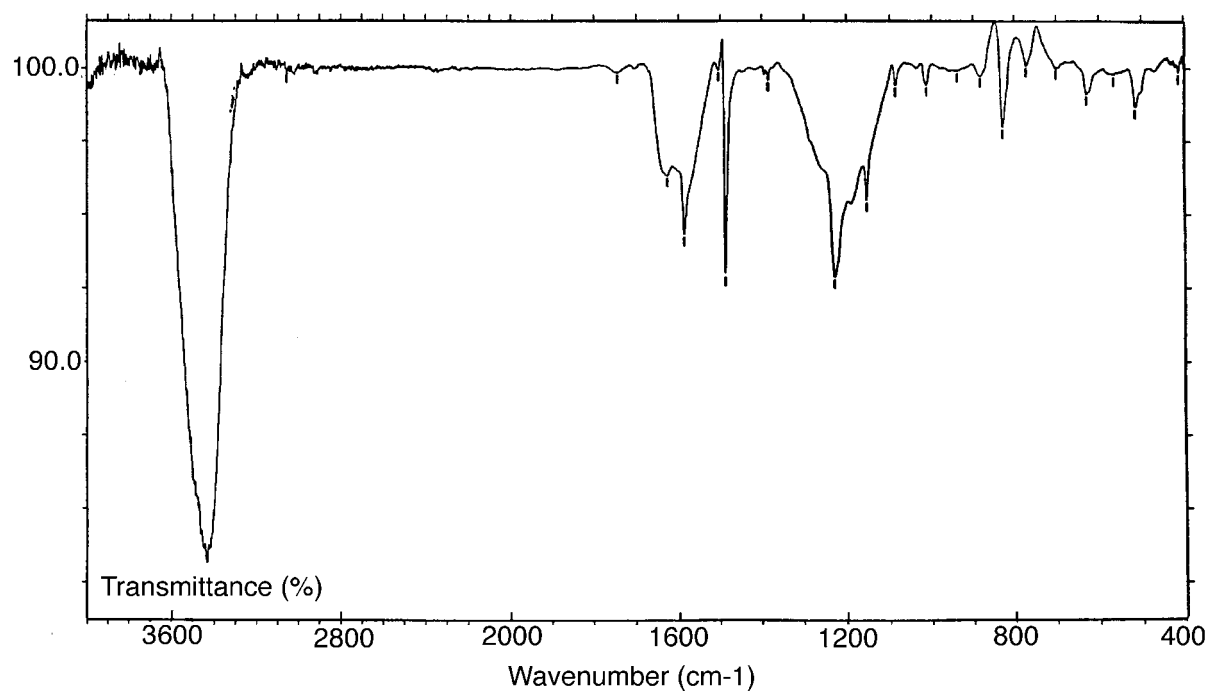

**Figure S3.** FTIR spectrum of C4.

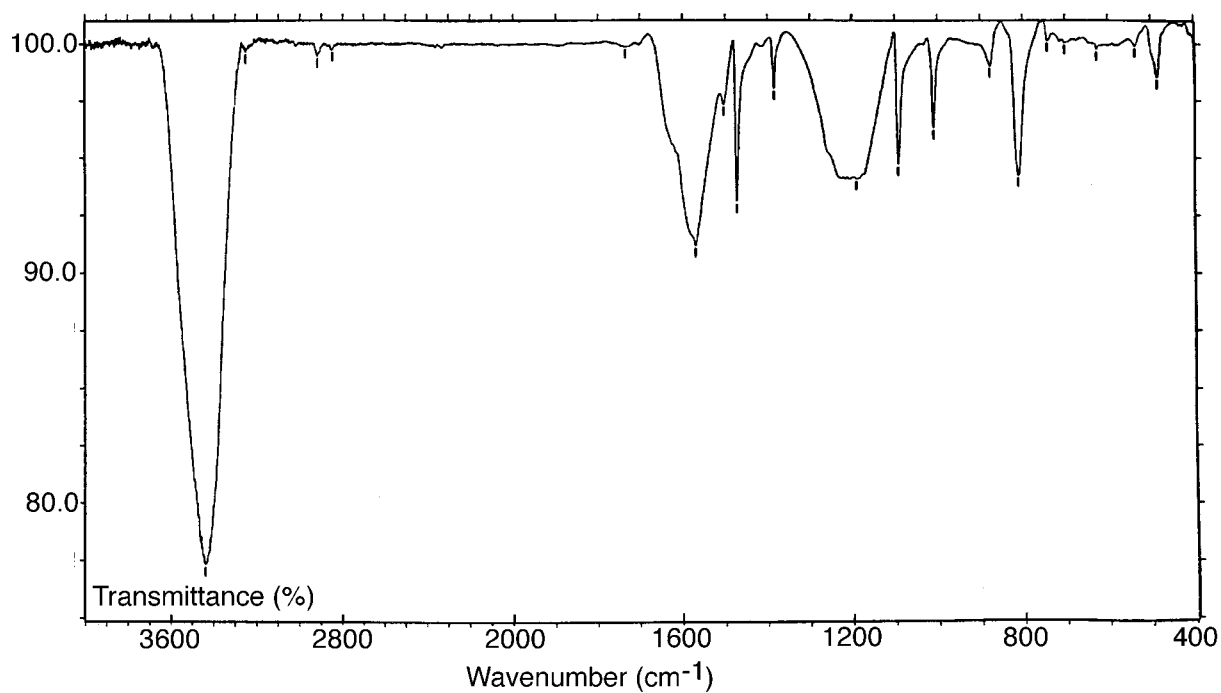

**Figure S4.** FTIR spectrum of **C5**.

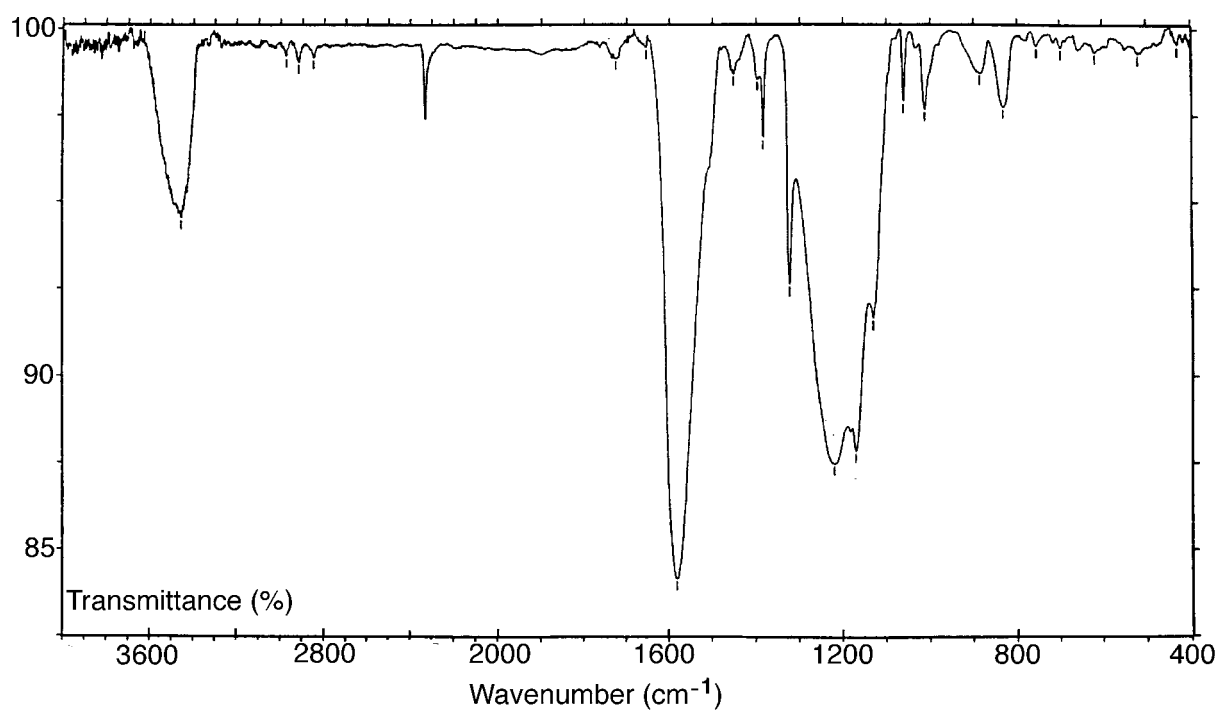

**Figure S5.** FTIR spectrum of **C7**.

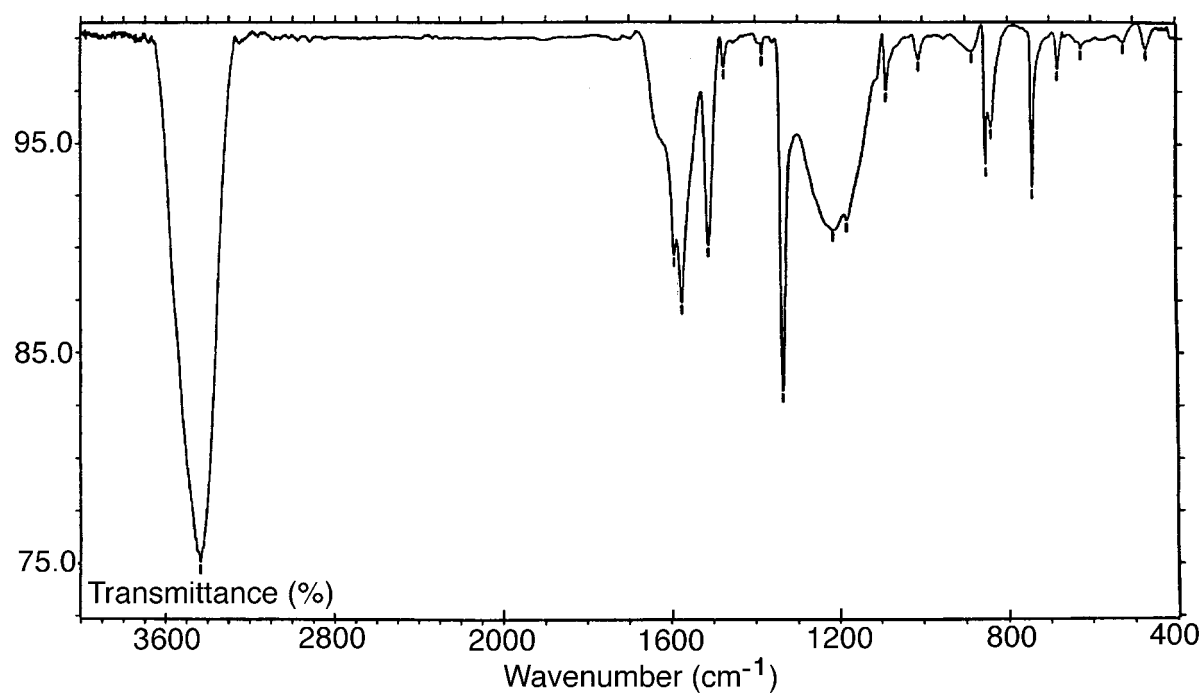

**Figure S6.** FTIR spectrum of **C8**.

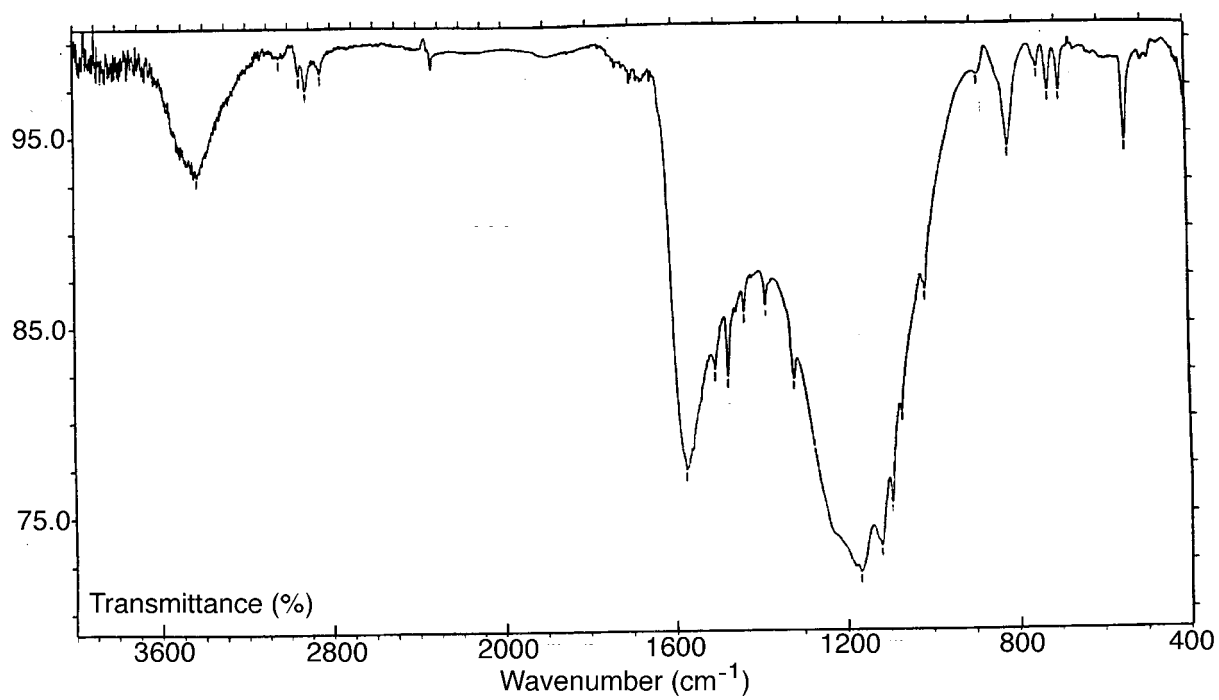

**Figure S7.** FTIR spectrum of **C9**.
